# Supplementary material for: Identification of Auxin Response Factor-Encoding Genes Expressed in Distinct Phases of Leaf Vein Development and with Overlapping Functions in Leaf Formation
Source: MDPI journal article supplement (doi:10.3390/plants8070242), 2019-07-23
Supplement: s1 [file s1]

# Identification of Auxin Response Factor-encoding genes expressed in distinct phases of leaf vein development and with overlapping functions in leaf formation

Mathias Schuetz, Mario Fidanza and Jim Mattsson

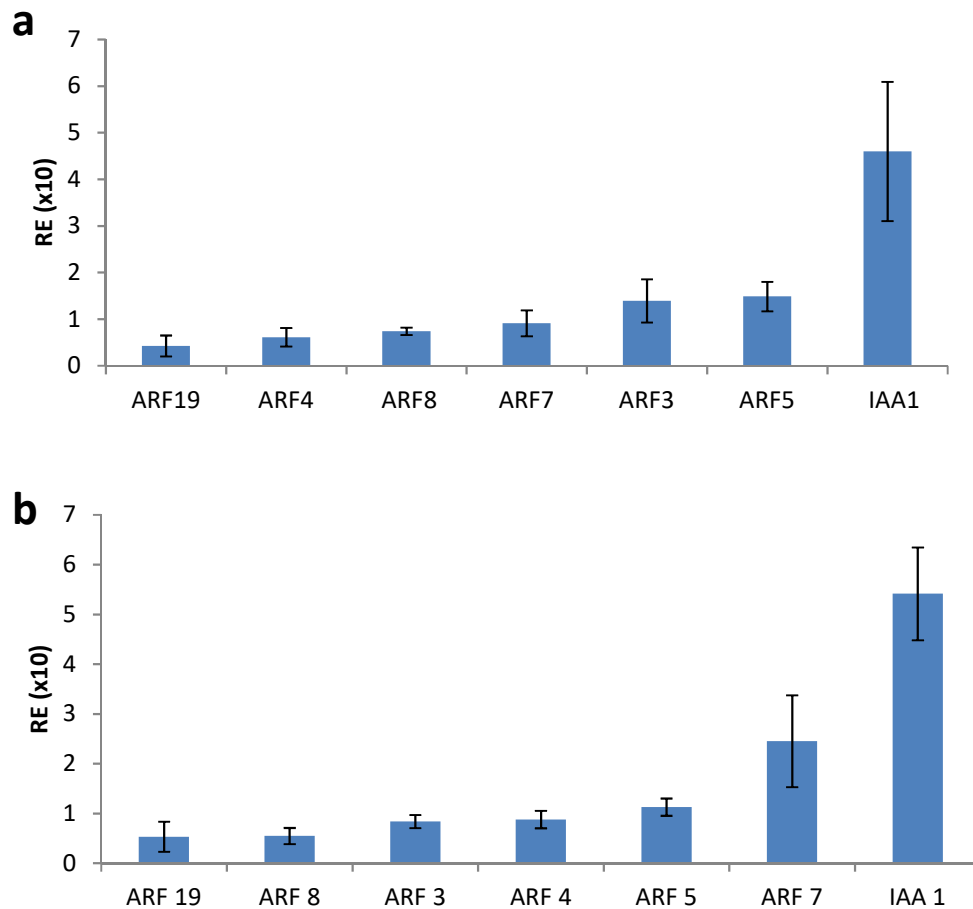

**Figure S2.** Relative expression levels of assessed *ARF* genes and the *IAA1* gene in leaf primordia. Leaf primordia of five day old **(a)** and six day old **(b)** seedlings were extracted, used for RNA purification, cDNA synthesis and RTQPCR as described in materials and methods. Relative expression was calculated using the delta CT method using the gene *ORNITHINE TRANSCARBAMYLASE* (OTC) gene (AT1G75330) as a normalization standard. Error bars represent standard deviation from three independent pools of extracted leaf primordia.
