# Supplementary material for: Identification of Auxin Response Factor-Encoding Genes Expressed in Distinct Phases of Leaf Vein Development and with Overlapping Functions in Leaf Formation
Source: MDPI journal article supplement (doi:10.3390/plants8070242), 2019-07-23
Supplement: s1 [file s1]

# Identification of Auxin Response Factor-encoding genes expressed in distinct phases of leaf vein development and with overlapping functions in leaf formation

Mathias Schuetz, Mario Fidanza and Jim Mattsson

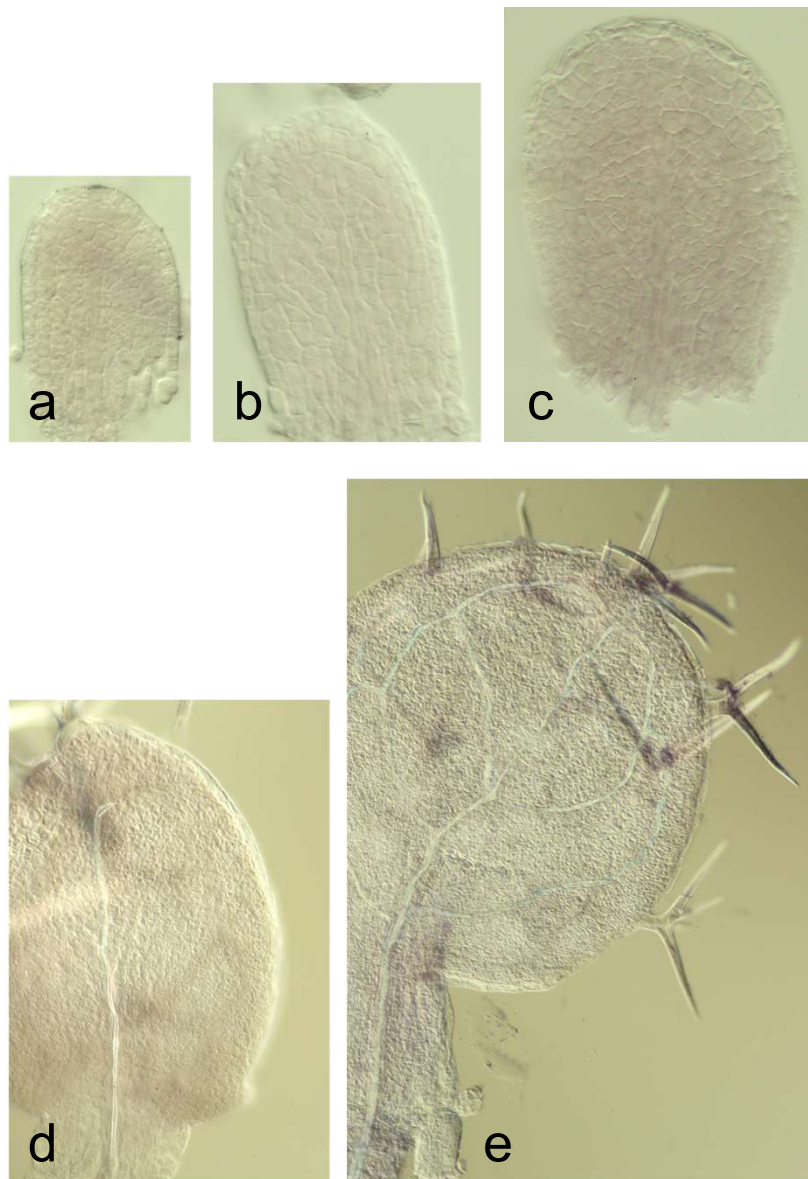

**Figure S1.** Negative control in situ RNA hybridization results using dig-labelled ARF4 sense strand transcripts as probes. No blue or purple color, indicative of hybridization, is detected. (a, b, c) stage I, (d) Stage II, (e) stage III primordia.
